# Supplementary material for: Designing fuel cell catalyst support for superior catalytic activity and low mass-transport resistance
Source: PubMed Central journal article supplement (PMC9579166; doi:10.1038/s41467-022-33892-8), 2022-10-18
Supplement: 41467_2022_33892_MOESM3_ESM.pdf [file 41467_2022_33892_MOESM3_ESM.pdf]

## Description of Additional Supplementary Files

**Video:** 3D TEM of a single Pt/cPDA particle
